# Supplementary material for: Impact of dobutamine stress on diastolic energetic efficiency of healthy left ventricle: an in vivo kinetic energy analysis
Source: Frontiers journal article supplement (doi:10.3389/fcvm.2023.1103751), 2023-03-21
Supplement: Data_Sheet_1.PDF [file Data_Sheet_1.PDF]

Online supplement to

**Impact of dobutamine stress on diastolic energetic efficiency of healthy left ventricle: an *in vivo* kinetic energy analysis**

Alessandra Riva<sup>1,2\*</sup>, Jonatan Eriksson<sup>3,4</sup>, Federica Viola<sup>5</sup>, Francesco Sturla<sup>2,1</sup>, Emiliano Votta<sup>1,2</sup>, Tino Ebbers<sup>5,3</sup>, Carl-Johan Carlhäll<sup>5,3,6</sup>, Petter Dyverfeldt<sup>5,3</sup>

<sup>1</sup> Department of Electronics, Information and Bioengineering, Politecnico di Milano, Milan, Italy

<sup>2</sup> 3D and Computer Simulation Laboratory, IRCCS, Policlinico San Donato, San Donato Milanese, Italy

<sup>3</sup> Center for Medical Image Science and Visualization, Linköping University, Sweden

<sup>4</sup> Department of Medical Radiation Physics and Department of Health, Medicine and Caring Sciences, Linköping University, Linköping, Sweden

<sup>5</sup> Unit of Cardiovascular Sciences, Department of Health, Medicine and Caring Sciences, Linköping University, Linköping, Sweden

<sup>6</sup> Department of Clinical Physiology in Linköping, Department of Health, Medicine and Caring Sciences, Linköping University, Linköping, Sweden

## **Supplementary methods**

The discrepancy between LV inflow and outflow, when computing pathlines, was computed as:

$$\frac{Inflow - Outflow}{mean(Inflow, Outflow)} \cdot 100$$

The diastolic length (**Table 1**) was computed as the time difference between ED and ES:

$$diastolic - length [s] = t_{ED} - t_{ES}$$

## Supplementary Tables

**Table S1.**  $TKE_V^{FC}$  for each flow component, computed during diastole for peak E-wave and A-wave.

|                                                | Rest<br>(n = 11) | Dobutamine<br>(n = 11) | p-value |
|------------------------------------------------|------------------|------------------------|---------|
| Peak E-wave - $TKE_V^{FC}$ [J/m <sup>3</sup> ] |                  |                        |         |
| Direct Flow                                    | 19.4 ± 6.1       | 42.1 ± 17.5            | 0.002   |
| Retained Inflow                                | 38.7 ± 15.5      | 39.5 ± 14.5            | 0.341   |
| Delayed Ejection Flow                          | 12.4 [8.9; 14.8] | 27.2 ± 6.8             | 0.001   |
| Residual Volume                                | 7.5 ± 3.8        | 15.0 [10.0; 24.9]      | 0.003   |
| Peak A-wave - $TKE_V^{FC}$ [J/m <sup>3</sup> ] |                  |                        |         |
| Direct Flow                                    | 9.9 ± 5.9        | 31.4 ± 19.7            | 0.003   |
| Retained Inflow                                | 5.7 ± 3.7        | 14.7 [6.5; 34.5]       | 0.003   |
| Delayed Ejection Flow                          | 4.8 ± 4.4        | 18.2 ± 10.3            | 0.001   |
| Residual Volume                                | 2.0 ± 1.6        | 3.1 [1.1; 17.5]        | 0.083   |

TKE<sub>v</sub>, turbulent kinetic energy normalized per flow component (FC) volume.

**Table S2.** Time integral of  $TKE_V^{FC}$  for each flow component during diastole.

| $\int_{t_D} TKE_V^{FC} dt$ [Pa·s] | Rest<br>(n = 11)  | Dobutamine<br>(n = 11) | p-value |
|-----------------------------------|-------------------|------------------------|---------|
| Direct Flow                       | 8.50 [6.29; 9.01] | 10.7 ± 2.34            | 0.002   |
| Retained Inflow                   | 6.71 ± 1.14       | 9.55 ± 2.59            | 0.004   |
| Delayed Ejection Flow             | 4.64 ± 2.03       | 7.08 ± 2.05            | 0.002   |
| Residual Volume                   | 2.20 ± 1.06       | 3.54 ± 1.40            | 0.027   |

TKE<sub>V</sub>, turbulent kinetic energy normalized per flow component (FC) volume.

## Supplementary Figures

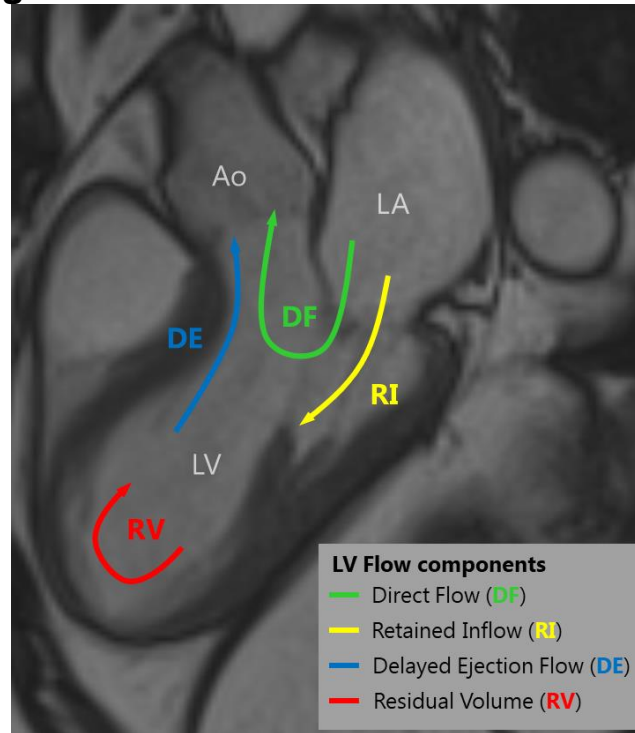

**Figure S1.** Schematic of the four flow components of the left ventricular blood flow. Direct Flow (DF, green) is the blood flow that enters the left ventricle during diastole and leaves during systole, for the analyzed heartbeat. Retained Inflow (RI, yellow) is the blood that enters the left ventricle during diastole but does not leave during systole in the considered heartbeat. Delayed Ejection Flow (DE, light blue) is the blood that already resides in the left ventricle during diastole and leaves during systole for the analyzed heartbeat. Residual Volume (RV, red) is the blood that resides in the left ventricle for at least two cardiac cycles. Ao, aorta; LA, left atrium; LV, left ventricle.

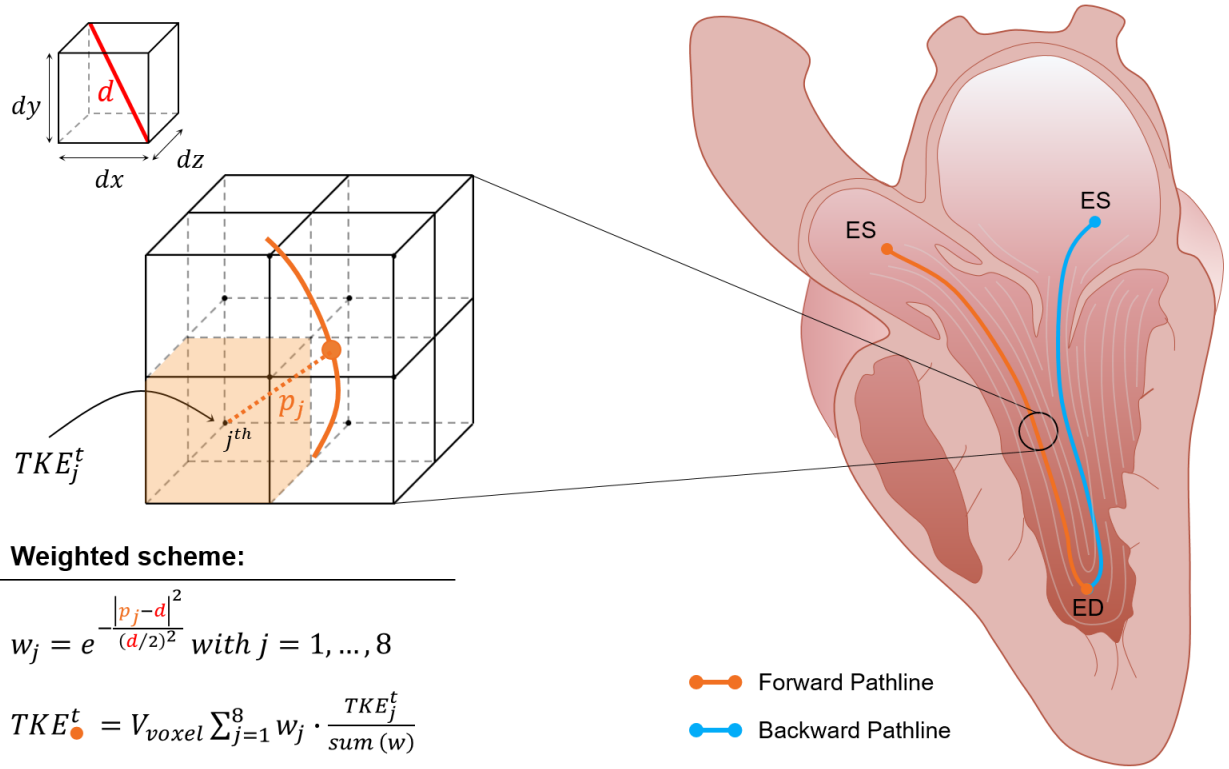

**Figure S2.** Schematic representation of the exploited weighted scheme for pathline TKE computation. ED, end diastole; ES, end systole; TKE, turbulent kinetic energy.

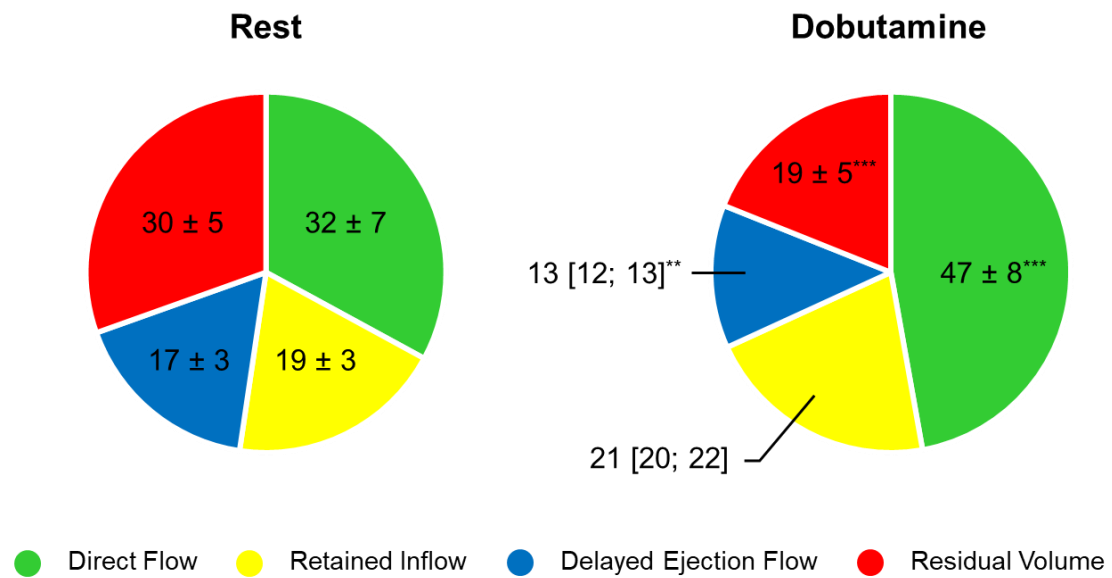

**Figure S3.** LV flow components as percentage of LV end-diastolic volume expressed as mean  $\pm$  SD, if normally distributed, as median [IQR] otherwise. \*,  $p \leq 0.05$ ; \*\*,  $p \leq 0.01$ ; \*\*\*,  $p \leq 0.001$ .
